# Supplementary material for: RND3 promotes Snail 1 protein degradation and inhibits glioblastoma cell migration and invasion
Source: PubMed Central journal article supplement (PMC5347701; doi:10.18632/oncotarget.12396), 2016-10-01
Supplement: oncotarget-07-82411-s001.pdf [file oncotarget-07-82411-s001.pdf]

## RND3 promotes Snail 1 protein degradation and inhibits glioblastoma cell migration and invasion

### Supplementary Materials

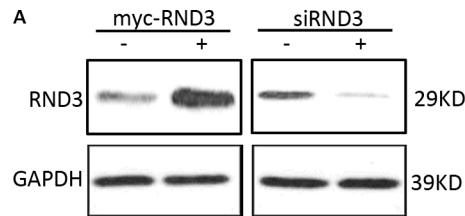

**Supplementary Figure S1: Forced expression of RND3 inhibited glioblastoma cell migration and invasion.** Immunoblot analysis showed significant increase of RND3 level after forced expression of RND3 and downregulation of RND3 after siRND3 treatment.

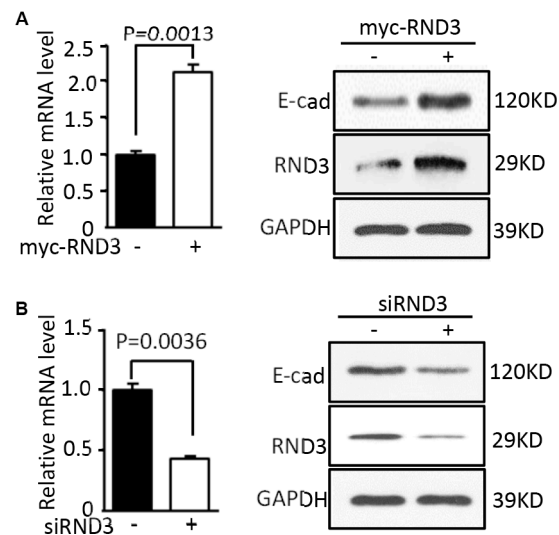

**Supplementary Figure S2: RND3 also positively regulated E-cadherin expression in U87 cells.** (A) Forced expression of RND3 in U87 cells upregulated E-cadherin transcript (left panel) and protein levels (right panel). (B) Downregulation of RND3 by siRNA treatment also led to repression of E-cadherin transcript (left panel) and protein levels (right panel) in U87 cells.
